# Supplementary material for: Subthreshold Micropulse Laser Versus Oral Spironolactone in Chronic Central Serous Chorioretinopathy: A Quasi-Randomized Controlled Trial
Source: PubMed Central journal article supplement — Transl Vis Sci Technol. 2024 Aug 12;13(8):19. doi: 10.1167/tvst.13.8.19 (PMC11323996; doi:10.1167/tvst.13.8.19), 2024-08-12

**Fig. S1.** Examples of the change in subfoveal choroidal thickness (SFCT) and serous subretinal fluid (SRF) with spectral domain optical coherence tomography (SD-OCT) in a 38-year-old patient with chronic central serous chorioretinopathy (CSC) after subthreshold micropulse laser (SML). The SFCT was 464.5  $\mu\text{m}$ , 456  $\mu\text{m}$  and 453.5  $\mu\text{m}$  at baseline, 1 month and 3 months, respectively. The right line is the change of CRT showed with SD-OCT instrument's software. The green region is the area where the retina is reduced from baseline.

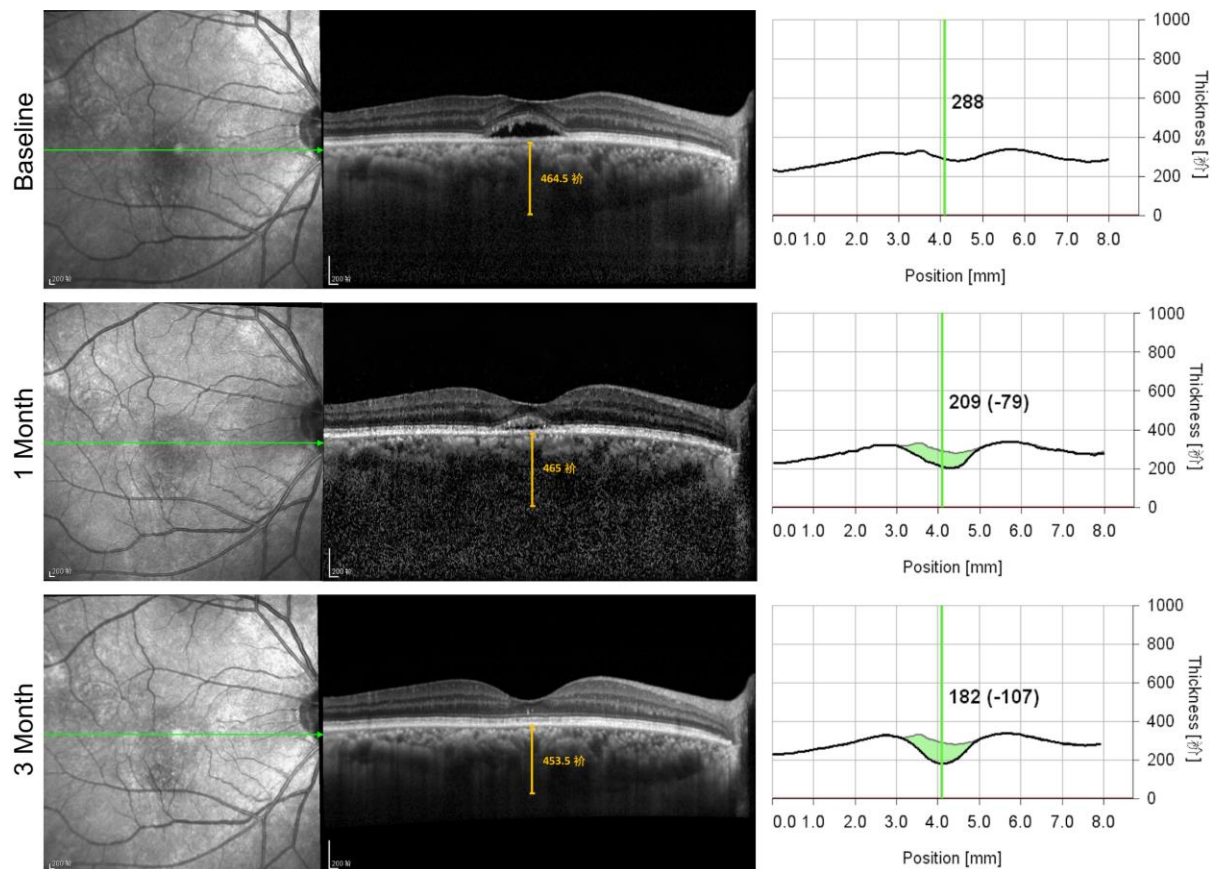

**Fig. S2.** Examples of the change in subfoveal choroidal thickness (SFCT) and serous subretinal fluid (SRF) with spectral domain optical coherence tomography (SD-OCT) in a 44-year-old patient with chronic central serous chorioretinopathy (CSC) after oral spironolactone. The SFCT was 386.5  $\mu\text{m}$ , 378.5  $\mu\text{m}$  and 357.5  $\mu\text{m}$  at baseline, 1 month and 3 months, respectively. The right line is the change of CRT showed with SD-OCT instrument's software. The green region is the area where the retina is reduced from baseline.

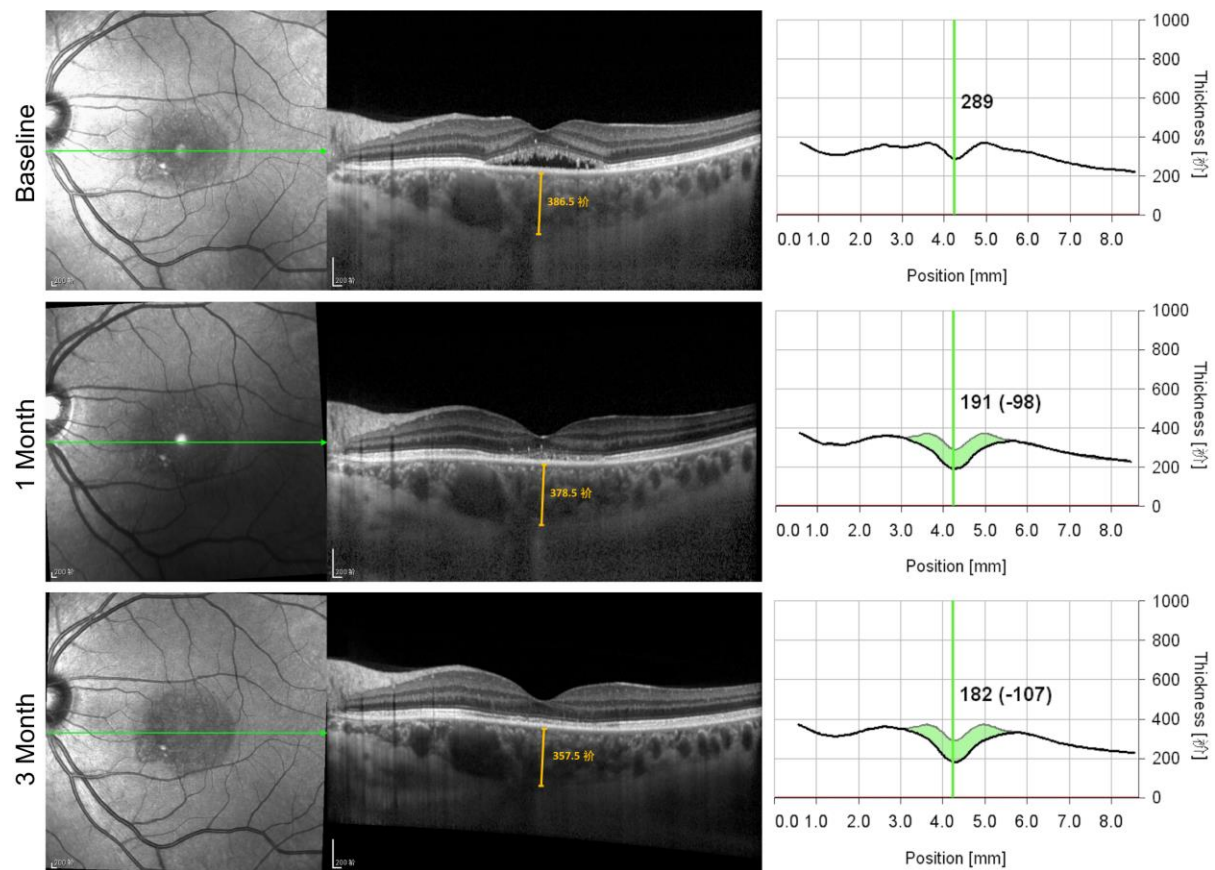

Supplement: tvst-13-8-19_s001.pdf [file tvst-13-8-19_s001.pdf]
